# Supplementary material for: Deciphering the cellular source of tumor relapse identifies CD44 as a major therapeutic target in pancreatic adenocarcinoma
Source: PubMed Central journal article supplement (PMC4480689; doi:10.18632/oncotarget.3510), 2015-03-10
Supplement: oncotarget-06-7408-s001.pdf [file oncotarget-06-7408-s001.pdf]

# Deciphering the cellular source of tumor relapse identifies CD44 as a major therapeutic target in pancreatic adenocarcinoma

## Supplementary Material

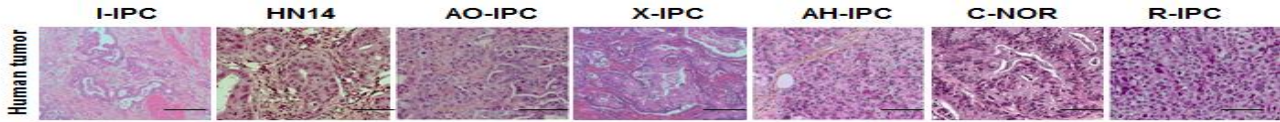

**Figure S1:** Examples of H&E staining of the PDACs obtained from human tumors. Scale bar: 100  $\mu$ m.

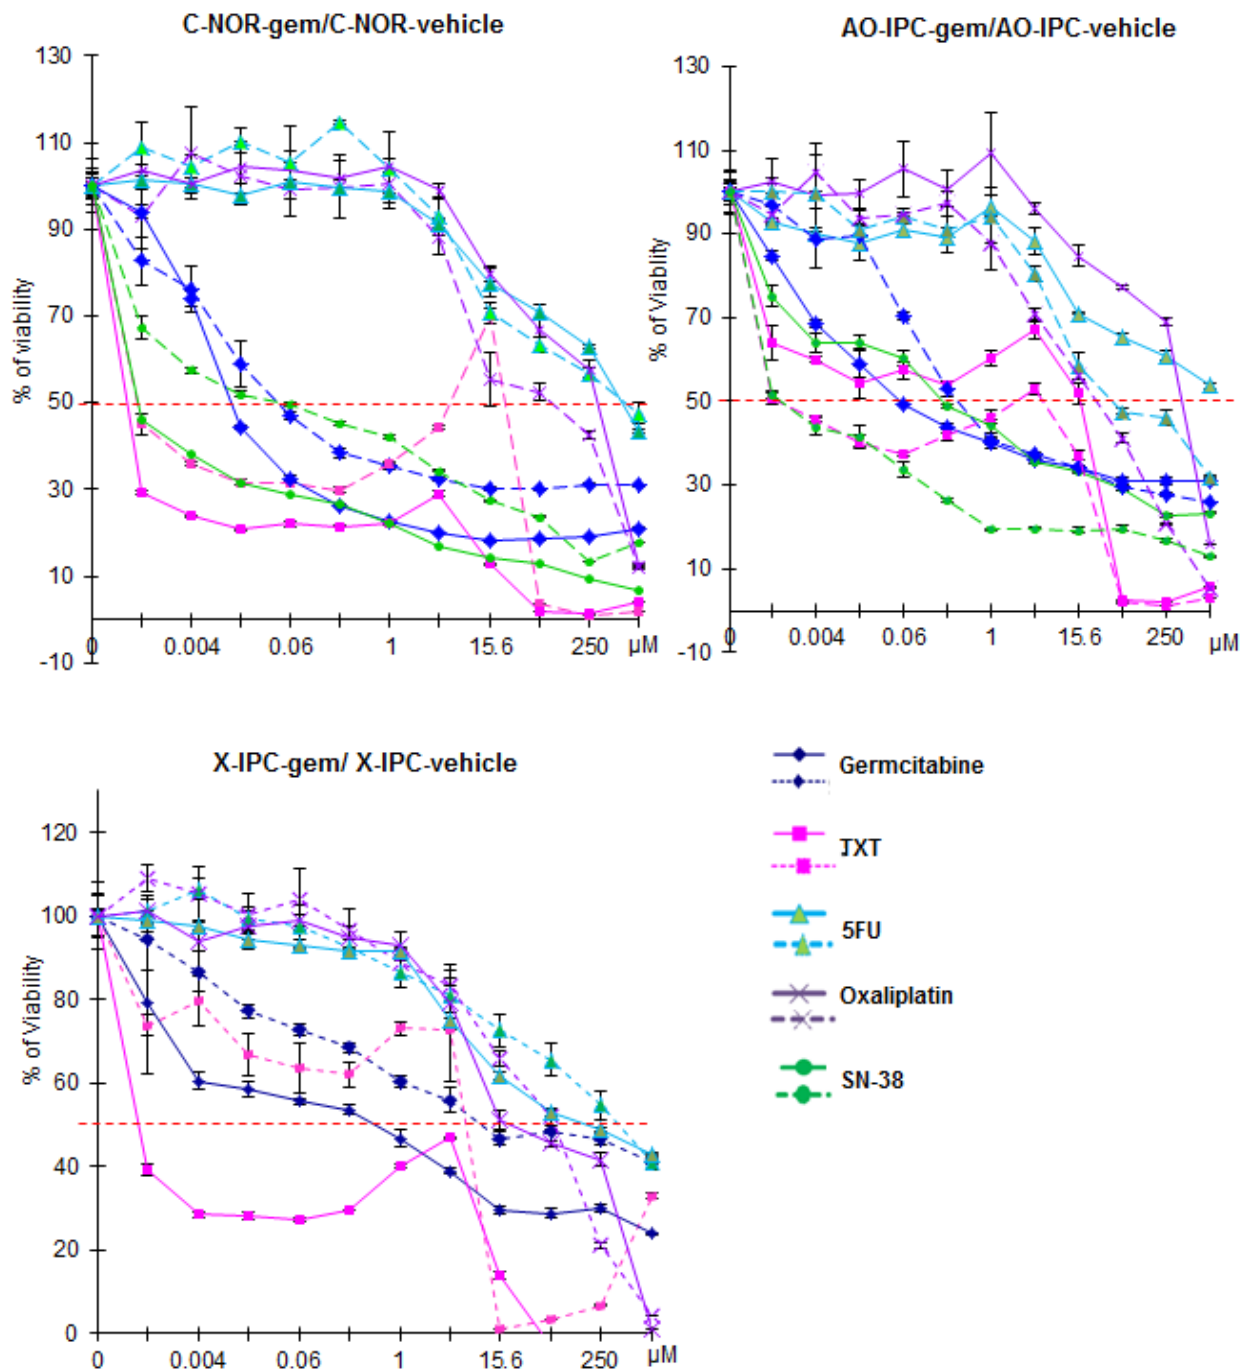

**Figure S2:** Representative curves for the chemogram analysis performed on xenograft-derived cells. The continuous line indicates vehicle-treated xenografts, and the discontinuous line shows curves for the gemcitabine-treated xenografts.

**A**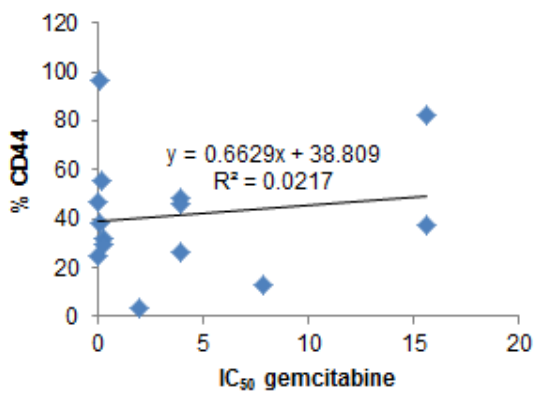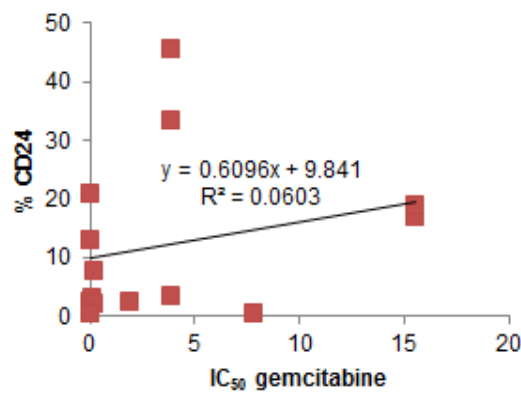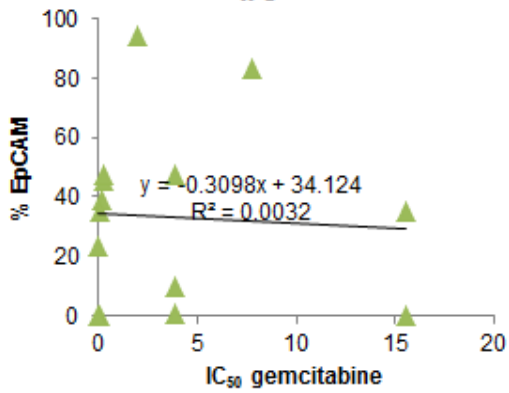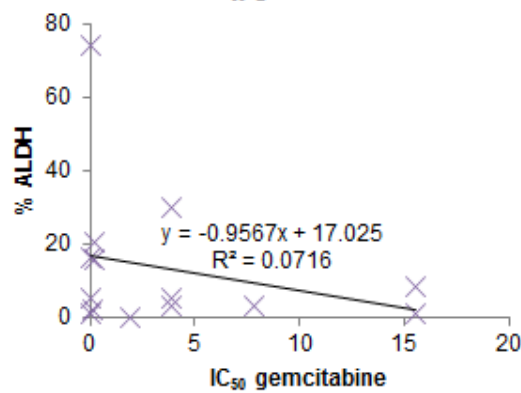**B**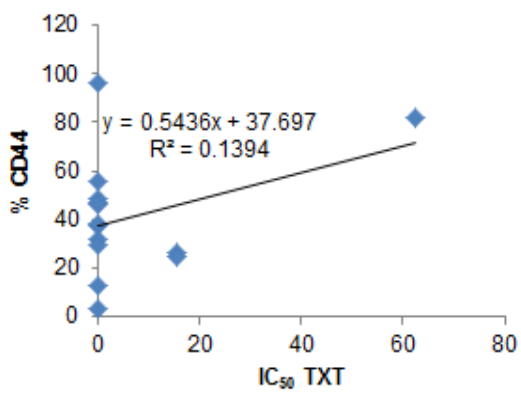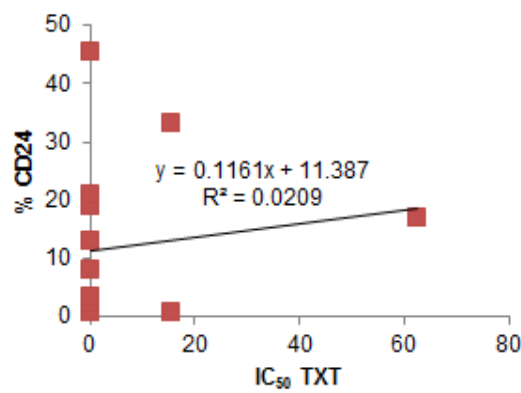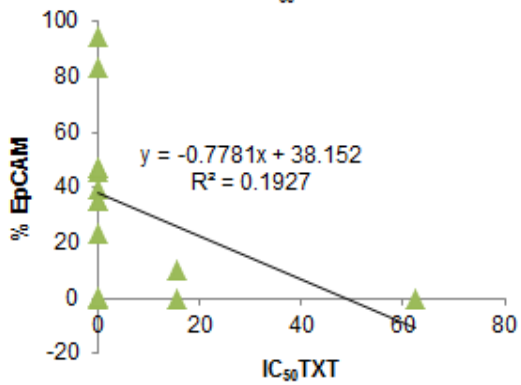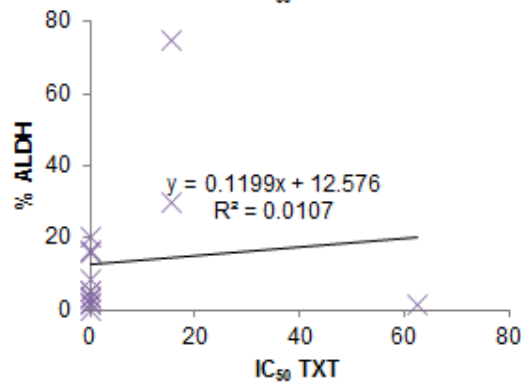

**C**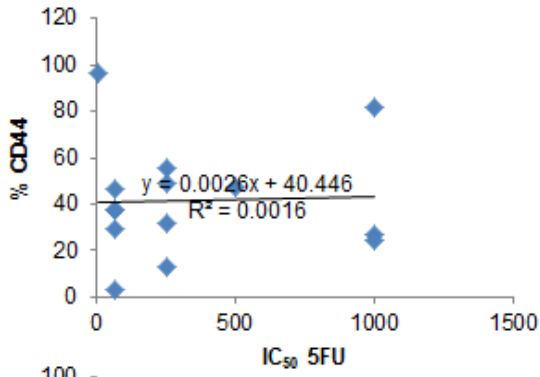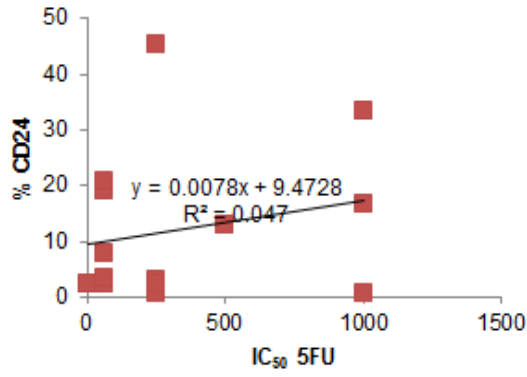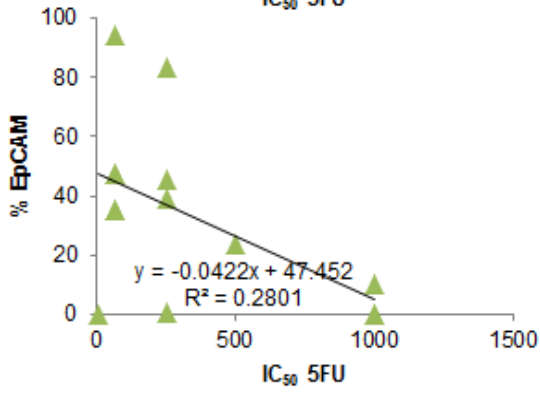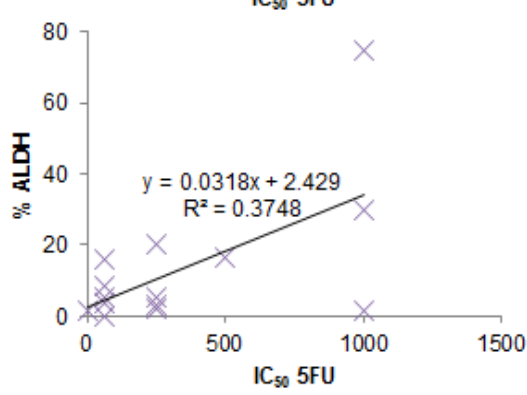**D**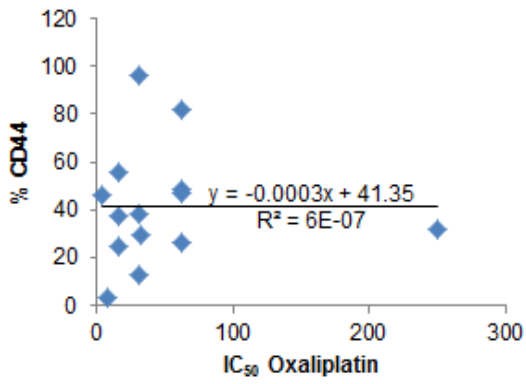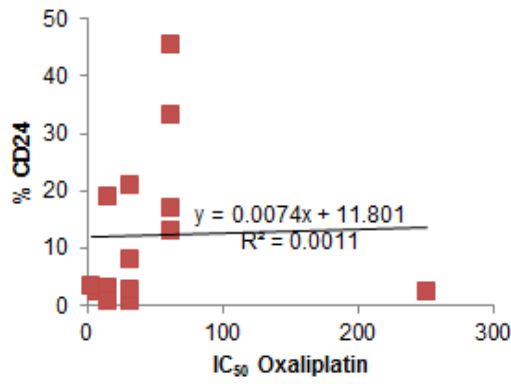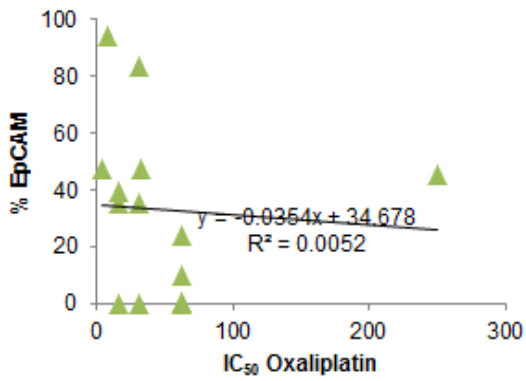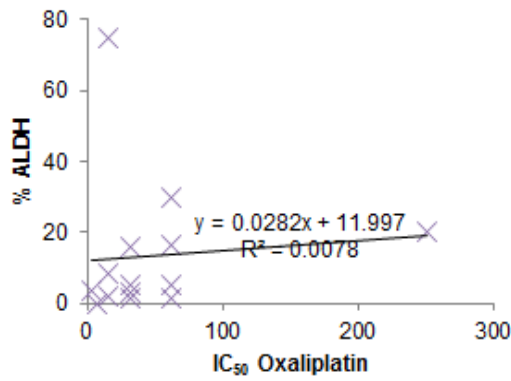

**F**

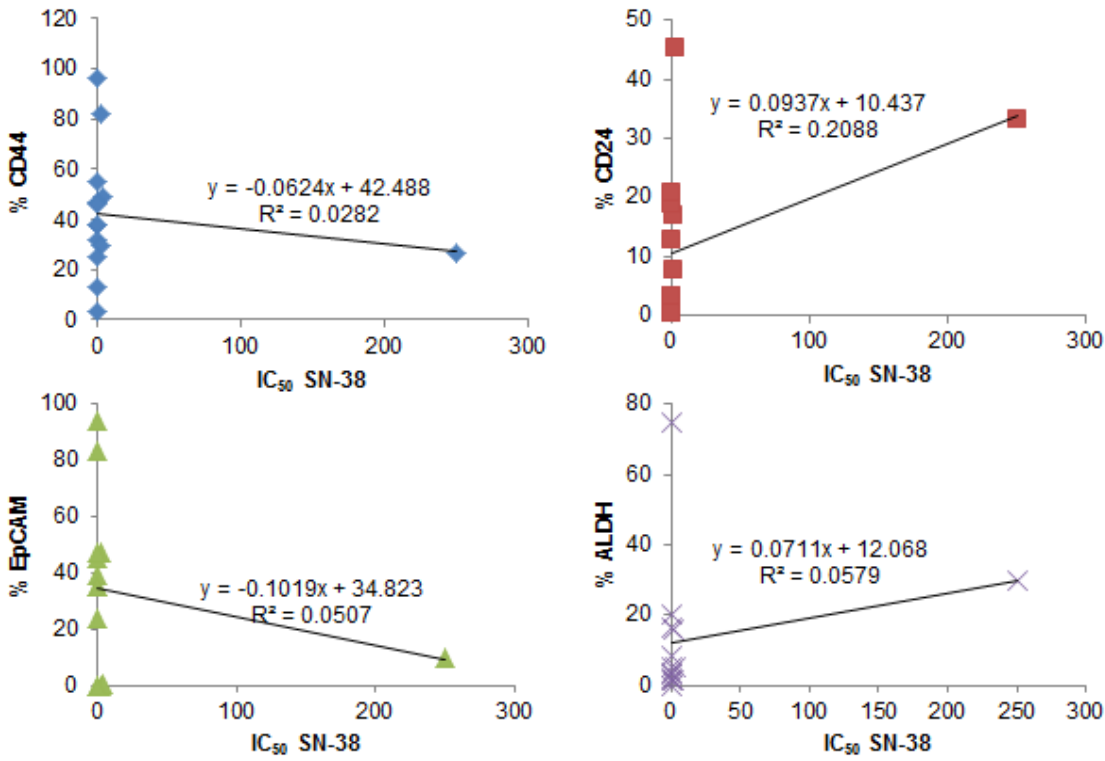

**Figure S3:** Linear regression of the mean values corresponding to CSC-marker expression against the  $IC_{50}$  of the anticancer drugs (A-E) for each cell line.

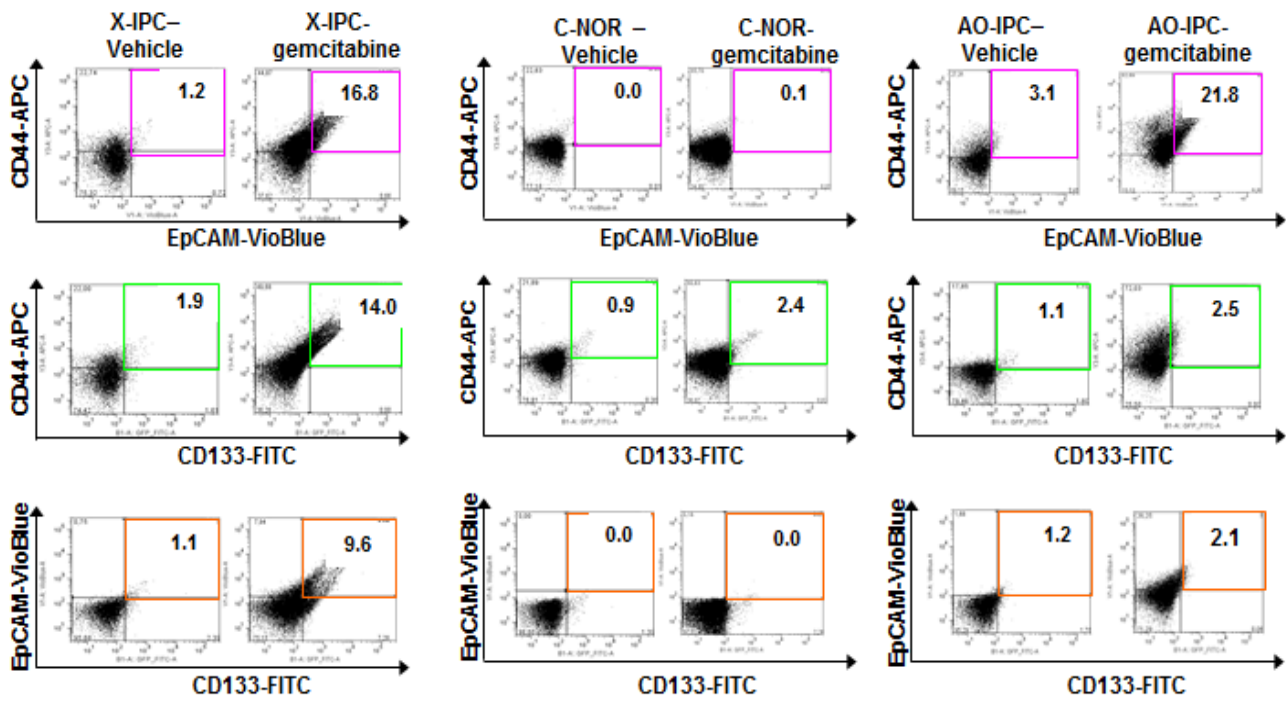

**Figure S4:** Flow cytometry of CD44-APC, EpCAM-VioBlue and CD133-FITC was used to analyze double positive cells. Representative plots are shown for each tumor.

**Table S1:** List of antibodies utilized for IF and Western Blotting.

| Antibody         | Source | Dilution | Manufacturer           | Technique  |
|------------------|--------|----------|------------------------|------------|
| CD44-FITC        | Goat   | 1/400    | Biologendes            | IF         |
| CD133-FITC       | Mouse  | 1/200    | Merck Milipore         | IF         |
| EpCAM-FITC       | Goat   | 1/400    | Biologendes            | IF         |
| CD44-APC         | Mouse  | 1/50     | Miltenyi Biotec        | FC         |
| CD24-PE          | Mouse  | 1/50     | Miltenyi Biotec        | FC         |
| EpCAM-VioBlue    | Mouse  | 1/50     | Miltenyi Biotec        | FC         |
| ALDH-FITC        | Mouse  | 1/50     | Stem Cell Technologies | FC         |
| $\beta$ -Tubulin | Mouse  | 1/1000   | Invitrogen             | WB         |
| ZEB1             | Rabbit | 1/400    | Santa Cruz             | WB and IFI |
| MUC1             | Mouse  | 1/500    | Sigma                  | WB         |
| MUC1             | Rabbit | 1/200    | ABCAM                  | IFI        |

APC, allophycocyanin; FITC, fluorescence isothiocyanate; PE, phycoerythrin; IF, immunofluorescence; IFI, indirect immunofluorescence; WB, western blot; FC, flow cytometry

**Table S2:** The chief clinical characteristics of the patients studied and the principal biological information available for these tumors.

| Tumor Name | Origin  | Diagnosis  | State/Differentiation | Tumor Size | Treatment in humans | Recurrence | Passage in Mice |
|------------|---------|------------|-----------------------|------------|---------------------|------------|-----------------|
| R-IPC      | Biopsie | Metastasis | Moderately            | T4         | Folfinirox + RDT    | NA         | 6               |
| I-IPC      | Surgery | ADK        | Moderately            | T3         | Gemcitabine         | Yes        | 5               |
| AO-IPC     | Surgery | ADK        | Moderately            | T3         | Gemcitabine         | Yes        | 5               |
| AH-IPC     | Surgery | ADK        | Moderately            | T3         | Gemcitabine         | Yes        | 6               |
| X-IPC      | Surgery | ADK        | Poorly                | T4         | Gemcitabine         | Yes        | 5               |
| C-NOR      | Surgery | ADK        | Well                  | T3         | Gemcitabine         | Yes        | 5               |
| HN14       | Biopsie | ADK        | Moderately            | T4         | Folfinirox          | Yes        | 5               |



**Table S3:** Expression of CD44-APC, CD24-PE, EpCAM-VioBlue and ALDH-FITC markers in 14 different primary cell lines. Error bars  $\pm$  SEM; n=3 per group.

|                | CD44 |      | CD24 |     | EpCAM |      | ALDH |      |
|----------------|------|------|------|-----|-------|------|------|------|
|                | Mean | SEM  | Mean | SEM | Mean  | SEM  | Mean | SEM  |
| <b>Foie-8b</b> | 46.1 | 0.9  | 3.3  | 0.2 | 47.2  | 0.5  | 3.4  | 0.1  |
| <b>01.030</b>  | 24.8 | 1.1  | 0.5  | 0.3 | 0     | 0    | 74.5 | 1.2  |
| <b>HN-01</b>   | 47   | 0.8  | 12.9 | 0.7 | 23.5  | 0.3  | 16.4 | 0.3  |
| <b>E-NOR</b>   | 29.1 | 3    | 7.8  | 0.6 | 47.2  | 1.6  | 15.7 | 0.9  |
| <b>AH-IPC</b>  | 31.8 | 1.2  | 2.2  | 0.7 | 45.4  | 0.8  | 20.4 | 0.3  |
| <b>AD-IPC</b>  | 48.6 | 1.5  | 45.3 | 0.5 | 0.6   | 0.5  | 5.3  | 0.6  |
| <b>L-IPC</b>   | 96.2 | 1.2  | 2.5  | 0.6 | 0     | 1.7  | 1.2  | 0.31 |
| <b>J-IPC</b>   | 37.9 | 1.55 | 20.8 | 0.9 | 35.4  | 0.78 | 5.4  | 0.42 |
| <b>D-IPC</b>   | 26.6 | 1.2  | 33.3 | 0.7 | 10    | 0.8  | 30   | 3.5  |
| <b>B-TIM</b>   | 55.3 | 2.5  | 3.1  | 0.4 | 39.3  | 1.4  | 2.1  | 0.1  |
| <b>A-NOR</b>   | 3.2  | 0.5  | 2.4  | 0.4 | 94.2  | 2.5  | 0    | 0    |
| <b>HN-03</b>   | 37.4 | 1.5  | 18.9 | 0.8 | 35    | 1    | 8.5  | 0.5  |
| <b>H-NOR</b>   | 12.8 | 1.7  | 0.5  | 0.4 | 83.4  | 1.5  | 3.2  | 0.2  |
| <b>01.001</b>  | 81.9 | 3.5  | 16.8 | 2.3 | 0     | 0.2  | 1.2  | 0.3  |
